# Supplementary material
Source: PubMed Central journal article supplement (PMC2614217)
Supplement: NIHMS60316-supplement-SI1.pdf [file NIHMS60316-supplement-SI1.pdf]

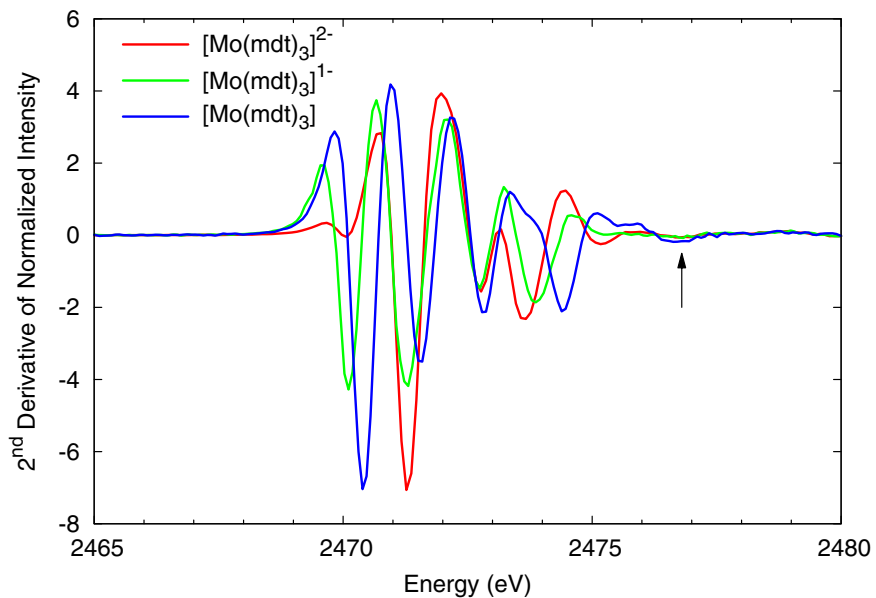

Figure S1: Second derivative of the normalized S K-edge spectra of the dianionic (solid red line), monoanionic (dashed green line), and neutral (dotted blue line) Mo tris(dithiolene) complexes. The arrow denotes the feature corresponding to the S 1s  $\rightarrow$  4p transition.

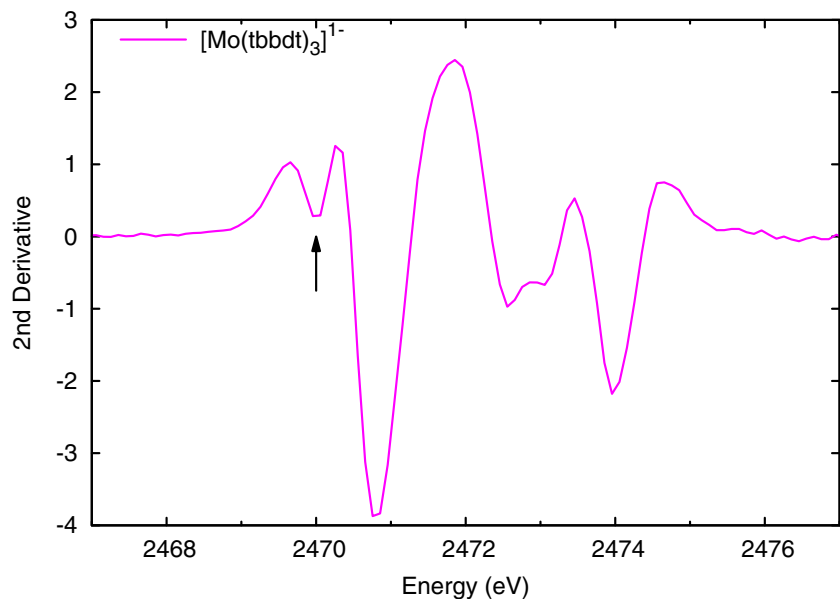

Figure S2: Second derivative of the normalized S K-edge spectrum of  $[\text{Mo}(\text{tbbdt})_3]^{1-}$ . The arrow denotes the feature corresponding to a transition to a predominately metal-based orbital.

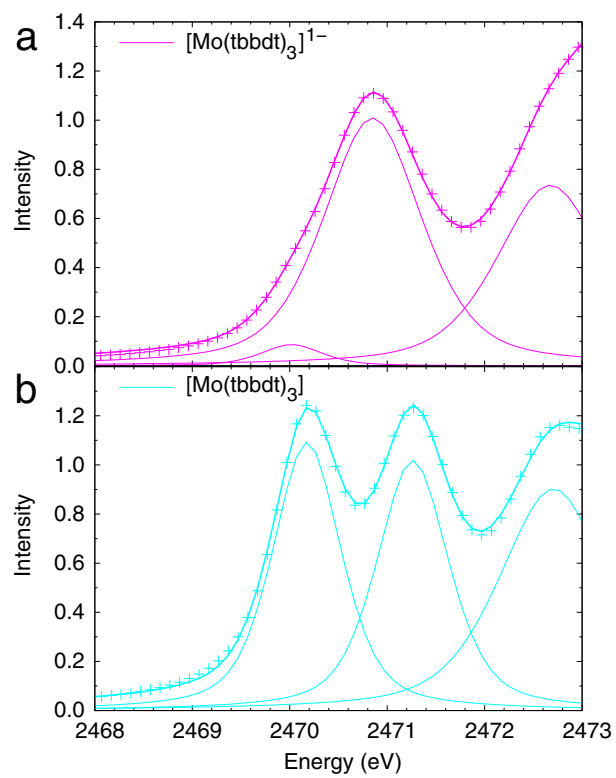

Figure S3: Representative fits of the [Mo(tbbdt)<sub>3</sub>]<sup>z</sup> (z = 1-, 0) complexes.

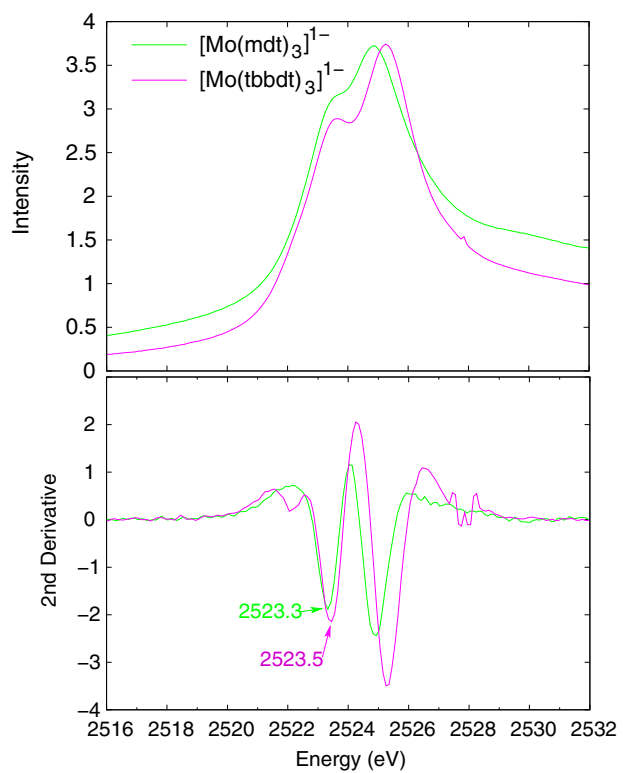

Figure S4: Normalized and second derivative Mo L<sub>3</sub>-edge XAS data of  $[\text{Mo}(\text{mdt})_3]^{1-}$  (green) and  $[\text{Mo}(\text{tbbdt})_3]^{1-}$  (purple). The  $[\text{Mo}(\text{tbbdt})_3]^{1-}$  data is from reference 16.

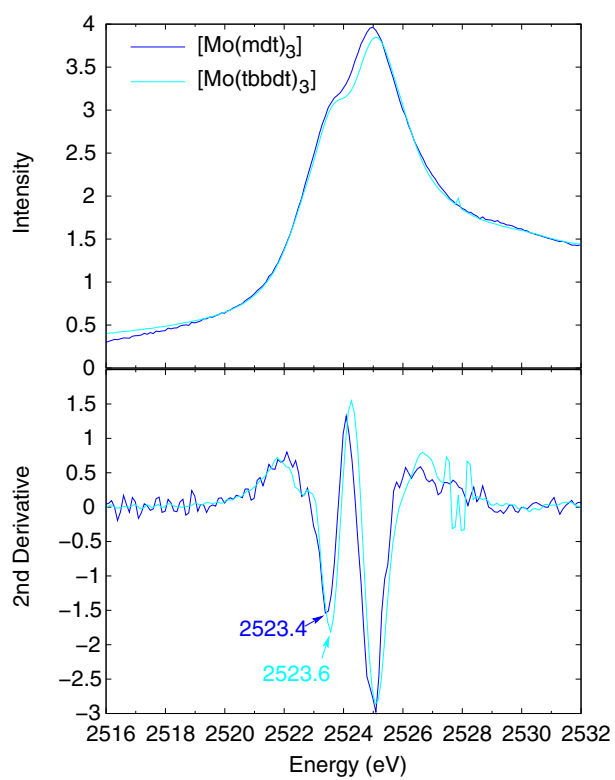

Figure S5: Normalized and second derivative Mo L<sub>3</sub>-edge XAS data of [Mo(mdt)<sub>3</sub>] (dark blue) and [Mo(tbbdt)<sub>3</sub>] (light blue). The [Mo(tbbdt)<sub>3</sub>] data is from reference 16.

The Cartesian coordinates of the geometry-optimized structures of  $[\text{Mo}(\text{mdt})_3]^z$  ( $z = 2-, 1-, 0$ ) and  $[\text{Mo}(\text{bdt})_3]^z$  ( $z = 1-, 0$ ). Geometry optimizations were performed in Gaussian 03 using the BP86 functional with the LanL2DZ basis set on Mo and the 6-311G\* basis set on S, C, and H.  $[\text{Mo}(\text{mdt})_3]^{2-}$  was optimized with two  $\text{Et}_4\text{N}^+$  counterions, which have been removed below.

**$[\text{Mo}(\text{mdt})_3]^{2-}$**

|    |          |          |          |
|----|----------|----------|----------|
| Mo | 0.00000  | 0.00000  | 0.00000  |
| S  | 1.27550  | 1.34574  | 1.53415  |
| S  | 1.23332  | 1.40841  | -1.52199 |
| C  | 2.29310  | 2.52955  | -0.66636 |
| C  | 2.31880  | 2.50957  | 0.69879  |
| C  | 3.10537  | 3.43905  | -1.56319 |
| H  | 3.73689  | 4.13996  | -0.98952 |
| H  | 2.44597  | 4.03706  | -2.22000 |
| H  | 3.76865  | 2.85111  | -2.22540 |
| C  | 3.16131  | 3.38597  | 1.59683  |
| H  | 3.76011  | 4.11221  | 1.02039  |
| H  | 3.86573  | 2.78435  | 2.20566  |
| H  | 2.53237  | 3.96201  | 2.30454  |
| S  | -1.79996 | 0.48918  | -1.58688 |
| S  | -1.90469 | 0.31276  | 1.53415  |
| C  | -3.28036 | 0.97204  | -0.71978 |
| C  | -3.33875 | 0.88762  | 0.64270  |
| C  | -4.35516 | 1.56126  | -1.60999 |
| H  | -5.32875 | 1.65644  | -1.09613 |
| H  | -4.50744 | 0.94898  | -2.51947 |
| H  | -4.06044 | 2.56914  | -1.96120 |
| C  | -4.49880 | 1.32237  | 1.51153  |
| H  | -5.41639 | 1.50943  | 0.92573  |
| H  | -4.26066 | 2.25536  | 2.06049  |
| H  | -4.73544 | 0.55680  | 2.27615  |
| S  | 0.71255  | -1.72983 | -1.57835 |
| S  | 0.43567  | -1.88597 | 1.53415  |
| C  | 1.30545  | -3.16463 | -0.70459 |
| C  | 1.18100  | -3.24605 | 0.65411  |
| C  | 2.02222  | -4.16990 | -1.58263 |
| H  | 2.20342  | -5.13143 | -1.06925 |
| H  | 3.00318  | -3.77262 | -1.90802 |
| H  | 1.45077  | -4.37868 | -2.50735 |
| C  | 1.69931  | -4.36688 | 1.52880  |
| H  | 1.99156  | -5.25683 | 0.94332  |
| H  | 0.93789  | -4.68314 | 2.26841  |
| H  | 2.58820  | -4.04517 | 2.10758  |

**[Mo(mdt)<sub>3</sub>]<sup>1-</sup>**

|    |          |          |          |
|----|----------|----------|----------|
| Mo | 0.00000  | 0.00000  | 0.00000  |
| S  | -0.63082 | 1.73572  | 1.56692  |
| S  | -0.65748 | 1.72585  | -1.56705 |
| S  | 1.81822  | -0.32333 | 1.56756  |
| S  | 1.82359  | -0.29487 | -1.56707 |
| S  | -1.18831 | -1.41402 | 1.56761  |
| S  | -1.16498 | -1.43330 | -1.56743 |
| C  | 3.30986  | -0.57212 | 0.68997  |
| C  | 3.31228  | -0.55923 | -0.68900 |
| C  | 4.57078  | -0.79980 | 1.49901  |
| C  | 4.57641  | -0.77014 | -1.49761 |
| C  | -1.15794 | 3.15314  | 0.68943  |
| C  | -1.17031 | 3.14860  | -0.68956 |
| C  | -1.59445 | 4.35791  | 1.49832  |
| C  | -1.62148 | 4.34811  | -1.49823 |
| C  | -2.15422 | -2.57718 | 0.68955  |
| C  | -2.14318 | -2.58630 | -0.68953 |
| C  | -2.98295 | -3.55481 | 1.49814  |
| C  | -2.95893 | -3.57472 | -1.49824 |
| H  | 4.35647  | -0.76996 | 2.58071  |
| H  | 5.33812  | -0.02904 | 1.28301  |
| H  | 5.02864  | -1.78356 | 1.27031  |
| H  | 4.36311  | -0.73708 | -2.57941 |
| H  | 5.04430  | -1.75000 | -1.27290 |
| H  | 5.33539  | 0.00771  | -1.27710 |
| H  | -1.49622 | 4.16357  | 2.57974  |
| H  | -2.65193 | 4.62320  | 1.29554  |
| H  | -0.98554 | 5.25248  | 1.25655  |
| H  | -1.54511 | 4.14600  | -2.57999 |
| H  | -1.00677 | 5.24360  | -1.27510 |
| H  | -2.67433 | 4.61624  | -1.27610 |
| H  | -2.85939 | -3.37694 | 2.57979  |
| H  | -2.69134 | -4.60449 | 1.29098  |
| H  | -4.06239 | -3.46710 | 1.26015  |
| H  | -2.80884 | -3.41888 | -2.57993 |
| H  | -4.04319 | -3.47587 | -1.28784 |
| H  | -2.67907 | -4.62170 | -1.26349 |

**[Mo(mdt)<sub>3</sub>]**

|    |          |          |          |
|----|----------|----------|----------|
| Mo | 0.00000  | 0.00000  | 0.00000  |
| S  | 0.00528  | 1.82694  | -1.56437 |
| S  | 0.00664  | 1.82680  | 1.56437  |
| S  | -1.58268 | -0.91310 | -1.56434 |
| S  | -1.58284 | -0.91257 | 1.56441  |
| S  | 1.58268  | -0.91310 | -1.56434 |
| S  | 1.58228  | -0.91403 | 1.56417  |
| C  | -0.36406 | 3.27986  | -0.69607 |
| C  | -0.36341 | 3.27982  | 0.69653  |
| C  | -0.63469 | 4.53081  | -1.50377 |
| H  | -0.45774 | 4.35834  | -2.57763 |
| H  | 0.01068  | 5.36767  | -1.17654 |
| H  | -1.68484 | 4.85898  | -1.38161 |
| C  | -0.63291 | 4.53084  | 1.50452  |
| H  | -0.45826 | 4.35735  | 2.57858  |
| H  | -1.68208 | 4.86142  | 1.38058  |
| H  | 0.01493  | 5.36650  | 1.17903  |
| C  | -2.65138 | -1.96409 | -0.69620 |
| C  | -2.65151 | -1.96380 | 0.69650  |
| C  | -3.60580 | -2.81777 | -1.50292 |
| H  | -3.53978 | -2.58387 | -2.57767 |
| H  | -4.65253 | -2.66423 | -1.17902 |
| H  | -3.37740 | -3.89337 | -1.37512 |
| C  | -3.60593 | -2.81727 | 1.50342  |
| H  | -3.54146 | -2.58158 | 2.57788  |
| H  | -3.37605 | -3.89280 | 1.37768  |
| H  | -4.65243 | -2.66554 | 1.17799  |
| C  | 3.03408  | -1.28814 | -0.69650 |
| C  | 3.03388  | -1.28863 | 0.69648  |
| C  | 4.25936  | -1.66118 | -1.50291 |
| H  | 4.02546  | -1.72554 | -2.57776 |
| H  | 4.67146  | -2.63567 | -1.17946 |
| H  | 5.05996  | -0.90761 | -1.37418 |
| C  | 4.25892  | -1.66217 | 1.50299  |
| H  | 4.02407  | -1.73002 | 2.57743  |
| H  | 5.05845  | -0.90691 | 1.37734  |
| H  | 4.67291  | -2.63501 | 1.17706  |

**[Mo(bdt)<sub>3</sub>]<sup>1-</sup>**

|    |          |          |          |
|----|----------|----------|----------|
| Mo | -0.01549 | -0.03479 | 0.00545  |
| S  | 0.90282  | 1.67647  | 1.46448  |
| S  | -0.42214 | 1.87843  | -1.43540 |
| C  | 0.74383  | 3.24024  | 0.66675  |
| C  | 0.22057  | 3.31983  | -0.64960 |
| C  | 0.16439  | 4.57218  | -1.29792 |
| H  | -0.23640 | 4.62270  | -2.31558 |
| C  | 0.60829  | 5.72900  | -0.65183 |
| H  | 0.55728  | 6.69387  | -1.16787 |
| C  | 1.11784  | 5.65146  | 0.65685  |
| H  | 1.46461  | 6.55586  | 1.16844  |
| C  | 1.18374  | 4.41740  | 1.30912  |
| H  | 1.58091  | 4.34710  | 2.32703  |
| S  | 1.75805  | -0.68266 | -1.51826 |
| S  | 1.09584  | -1.62806 | 1.46314  |
| C  | 2.79509  | -1.85223 | -0.70394 |
| C  | 2.54280  | -2.21461 | 0.64466  |
| C  | 3.42576  | -3.09942 | 1.30055  |
| H  | 3.22620  | -3.36814 | 2.34303  |
| C  | 4.53311  | -3.62663 | 0.63149  |
| H  | 5.20885  | -4.31206 | 1.15438  |
| C  | 4.77671  | -3.27629 | -0.70896 |
| H  | 5.64262  | -3.68830 | -1.23844 |
| C  | 3.91385  | -2.39824 | -1.36950 |
| H  | 4.09715  | -2.11766 | -2.41185 |
| S  | -1.89191 | -0.21523 | 1.53227  |
| S  | -1.52453 | -1.21569 | -1.48443 |
| C  | -3.21000 | -1.03636 | 0.69853  |
| C  | -3.07171 | -1.41303 | -0.66287 |
| C  | -4.16463 | -2.00501 | -1.33218 |
| H  | -4.05008 | -2.28554 | -2.38432 |
| C  | -5.36987 | -2.23367 | -0.66400 |
| H  | -6.20824 | -2.69519 | -1.19693 |
| C  | -5.50298 | -1.87146 | 0.68887  |
| H  | -6.44539 | -2.05059 | 1.21772  |
| C  | -4.43177 | -1.27983 | 1.36265  |
| H  | -4.52728 | -0.99251 | 2.41485  |



**[Mo(bdt)<sub>3</sub>]**

|    |          |          |          |
|----|----------|----------|----------|
| Mo | 0.00000  | 0.00000  | 0.00000  |
| S  | 1.17653  | -1.38433 | -1.58313 |
| S  | 1.17657  | -1.38428 | 1.58321  |
| C  | 2.51592  | -2.09297 | -0.71434 |
| C  | 3.57336  | -2.73117 | -1.41483 |
| C  | 4.60437  | -3.34482 | -0.70856 |
| C  | 2.51594  | -2.09294 | 0.71442  |
| C  | 4.60440  | -3.34478 | 0.70862  |
| C  | 3.57342  | -2.73110 | 1.41490  |
| H  | 3.56819  | -2.72496 | -2.51018 |
| H  | 5.42312  | -3.82791 | -1.25280 |
| H  | 5.42317  | -3.82784 | 1.25286  |
| H  | 3.56829  | -2.72482 | 2.51025  |
| S  | 0.61000  | 1.71031  | -1.58298 |
| S  | 0.60994  | 1.71032  | 1.58307  |
| C  | 0.59912  | 3.22569  | -0.71395 |
| C  | 0.65509  | 4.45915  | -1.41490 |
| C  | 0.70553  | 5.65795  | -0.70864 |
| C  | 0.59908  | 3.22569  | 0.71403  |
| C  | 0.70549  | 5.65796  | 0.70870  |
| C  | 0.65500  | 4.45916  | 1.41497  |
| H  | 0.74208  | 6.60792  | 1.25328  |
| H  | 0.65223  | 4.45131  | -2.51029 |
| H  | 0.74216  | 6.60791  | -1.25322 |
| H  | 0.65208  | 4.45133  | 2.51036  |
| S  | -1.78609 | -0.32730 | -1.58246 |
| S  | -1.78606 | -0.32739 | 1.58255  |
| C  | -3.10239 | -1.07888 | -0.71362 |
| C  | -4.20985 | -1.62497 | -1.41460 |
| C  | -5.28583 | -2.15665 | -0.70875 |
| H  | -4.20187 | -1.62262 | -2.51008 |
| H  | -6.13679 | -2.57977 | -1.25384 |
| C  | -3.10236 | -1.07893 | 0.71370  |
| C  | -5.28580 | -2.15671 | 0.70880  |
| C  | -4.20980 | -1.62509 | 1.41466  |
| H  | -6.13674 | -2.57989 | 1.25388  |
| H  | -4.20180 | -1.62284 | 2.51014  |

## Complete References

### Reference 32

Frisch, M. J.; Trucks, G. W.; Schlegel, H. B.; Scuseria, G. E.; Robb, M. A.; Cheeseman, J. R.; J. A. Montgomery, J.; Vreven, T.; Kudin, K. N.; Burant, J. C.; Millam, J. M.; Iyengar, S. S.; Tomasi, J.; Barone, V.; Mennucci, B.; Cossi, M.; Scalmani, G.; Rega, N.; Petersson, G. A.; Nakatsuji, H.; Hada, M.; Ehara, M.; Toyota, K.; Fukuda, R.; Hasegawa, J.; Ishida, M.; Nakajima, T.; Honda, Y.; Kitao, O.; Nakai, H.; Klene, M.; Li, X.; Knox, J. E.; Hratchian, H. P.; Cross, J. B.; Adamo, C.; Jaramillo, J.; Gomperts, R.; Stratmann, R. E.; Yazyev, O.; Austin, A. J.; Cammi, R.; Pomelli, C.; Ochterski, J. W.; Ayala, P. Y.; Morokuma, K.; Voth, G. A.; Salvador, P.; Dannenberg, J. J.; Zakrzewski, V. G.; Dapprich, S.; Daniels, A. D.; Strain, M. C.; Farkas, O.; Malick, D. K.; Rabuck, A. D.; Raghavachari, K.; Foresman, J. B.; Ortiz, J. V.; Cui, Q.; Baboul, A. G.; Clifford, S.; Cioslowski, J.; Stefanov, B. B.; Liu, G.; Liashenko, A.; Piskorz, P.; Komaromi, I.; Martin, R. L.; Fox, D. J.; Keith, T.; Al-Laham, M. A.; Peng, C. Y.; Naayakkara, A.; Challacombe, M.; Gill, P. M. W.; Johnson, B.; Chen, W.; Wong, M. W.; Gonzalez, C.; Pople, J. A., *Gaussian 03, Revision C.02*, Wallingford, CT, **2004**.
